# Supplementary material for: Studies Relevant to the Functional Model of Mo-Cu CODH: In Situ Reactions of Cu(I)-L Complexes with Mo(VI) and Synthesis of Stable Structurally Characterized Heterotetranuclear MoVI2CuI2 Complex
Source: MDPI journal article supplement (doi:10.3390/molecules28083644), 2023-04-21
Supplement: s1 [file s1]

## **Electronic Supplementary Information**

For

### **Studies Relevant to the Functional Model of Mo-Cu CODH: In-situ Reactions of Cu(I)-L Complexes with Mo(VI) and Synthesis of Stable Structurally Characterized Heterotetranuclear Mo<sup>VI</sup><sub>2</sub>Cu<sup>I</sup><sub>2</sub> Complex**

Umesh I. Kaluarachchige Don,<sup>a</sup> Ahmad S. Almaat,<sup>a</sup> Cassandra L. Ward,<sup>b</sup> Stanislav Groysman<sup>a\*</sup>

<sup>a</sup>Department of Chemistry, Wayne State University, 5101 Cass Ave. Detroit MI 48202.

<sup>b</sup>Lumigen Instrument Center, Wayne State University, 5101 Cass Avenue, Detroit, Michigan 48202, United States.

E-mail: [groysman@wayne.edu](mailto:groysman@wayne.edu)

## Table of Contents

|                 |    |
|-----------------|----|
| 1. NMR spectra  | 3  |
| 2. Mass spectra | 20 |
| 3. IR spectra   | 23 |

## 1. NMR spectra

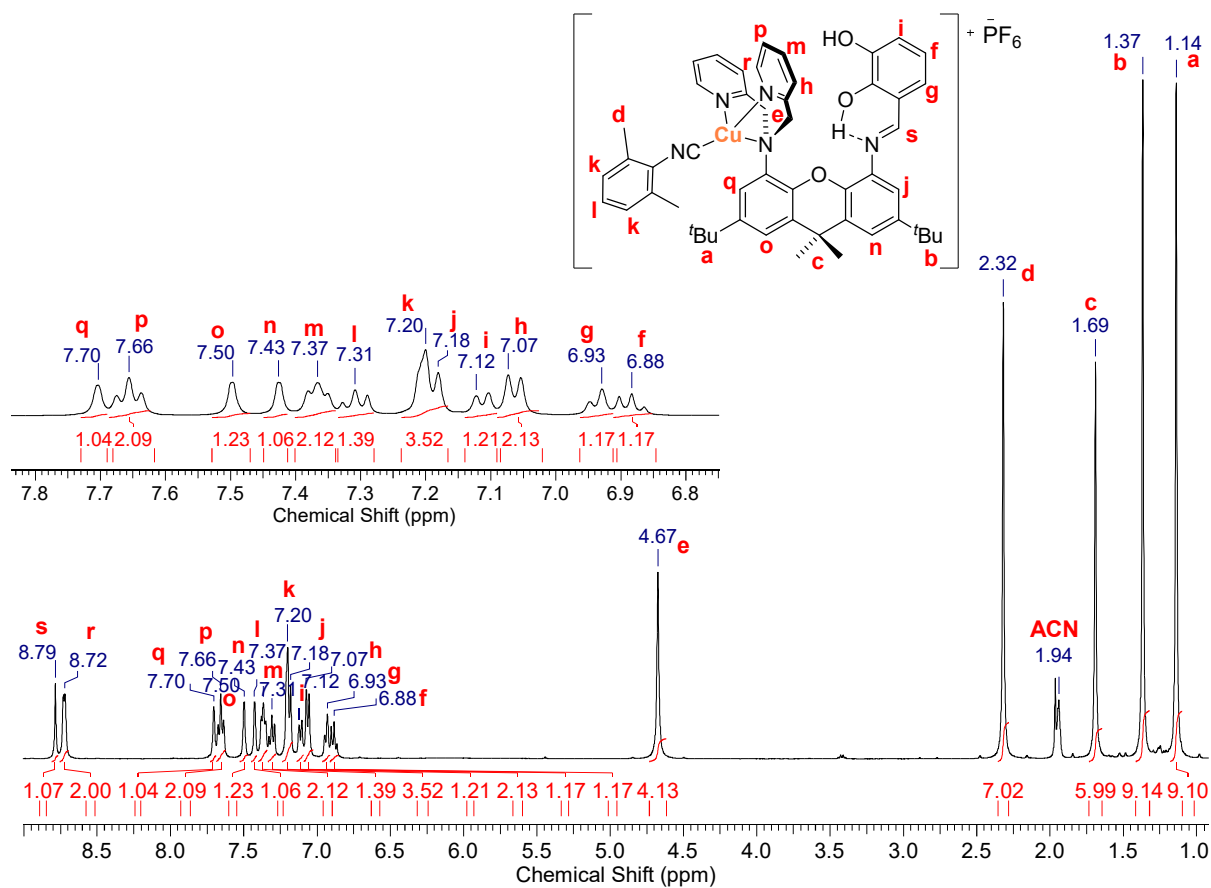

**Figure S1.** <sup>1</sup>H NMR spectrum of  $[\text{Cu}(\text{CN}(2,6\text{-Me}_2\text{C}_6\text{H}_3))(\text{LigH}_2)](\text{PF}_6)$  (2(PF<sub>6</sub>)) (CD<sub>3</sub>CN, 400 MHz).

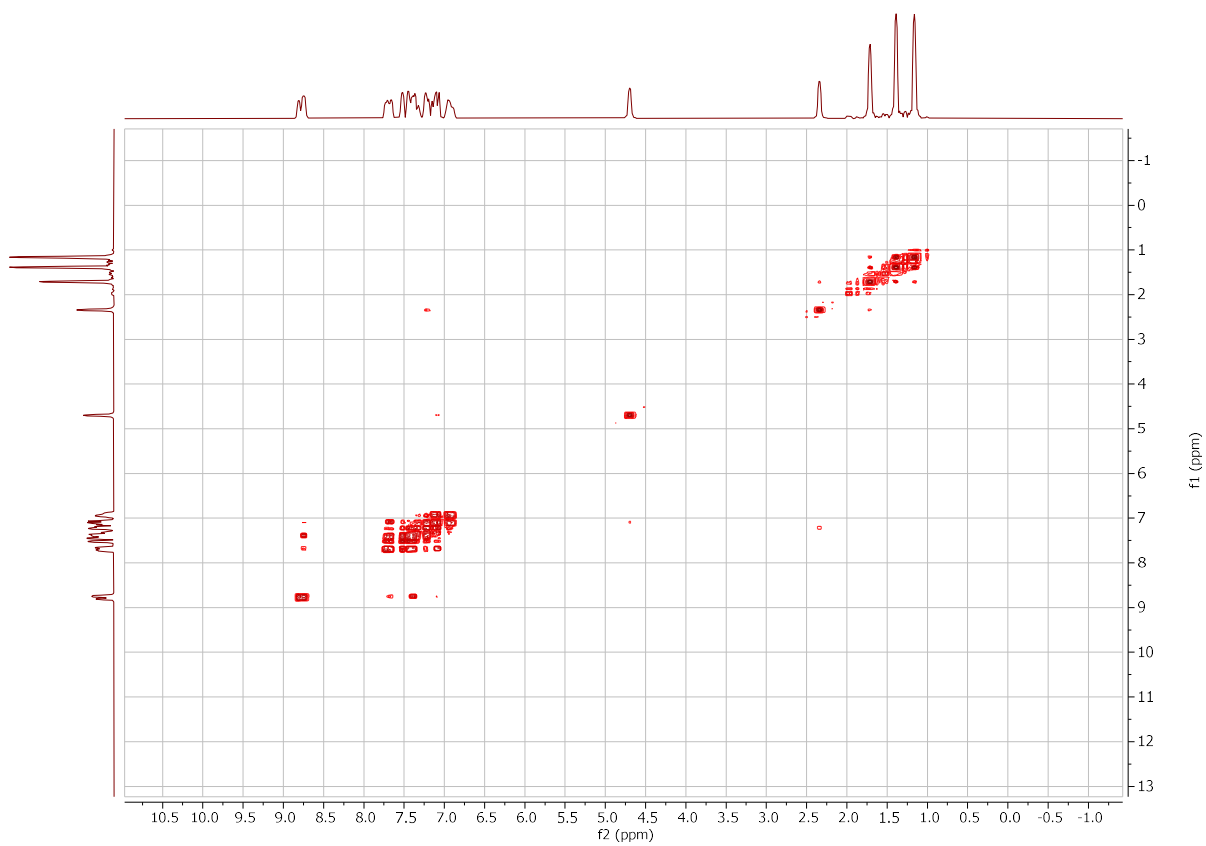

**Figure S2.**  $^1\text{H}$ - $^1\text{H}$  COSY NMR spectrum of  $[\text{Cu}(\text{CN}(2,6\text{-Me}_2\text{C}_6\text{H}_3))(\text{LigH}_2)](\text{PF}_6)$  (**2**( $\text{PF}_6$ )) ( $\text{CD}_3\text{CN}$ , 400 MHz).

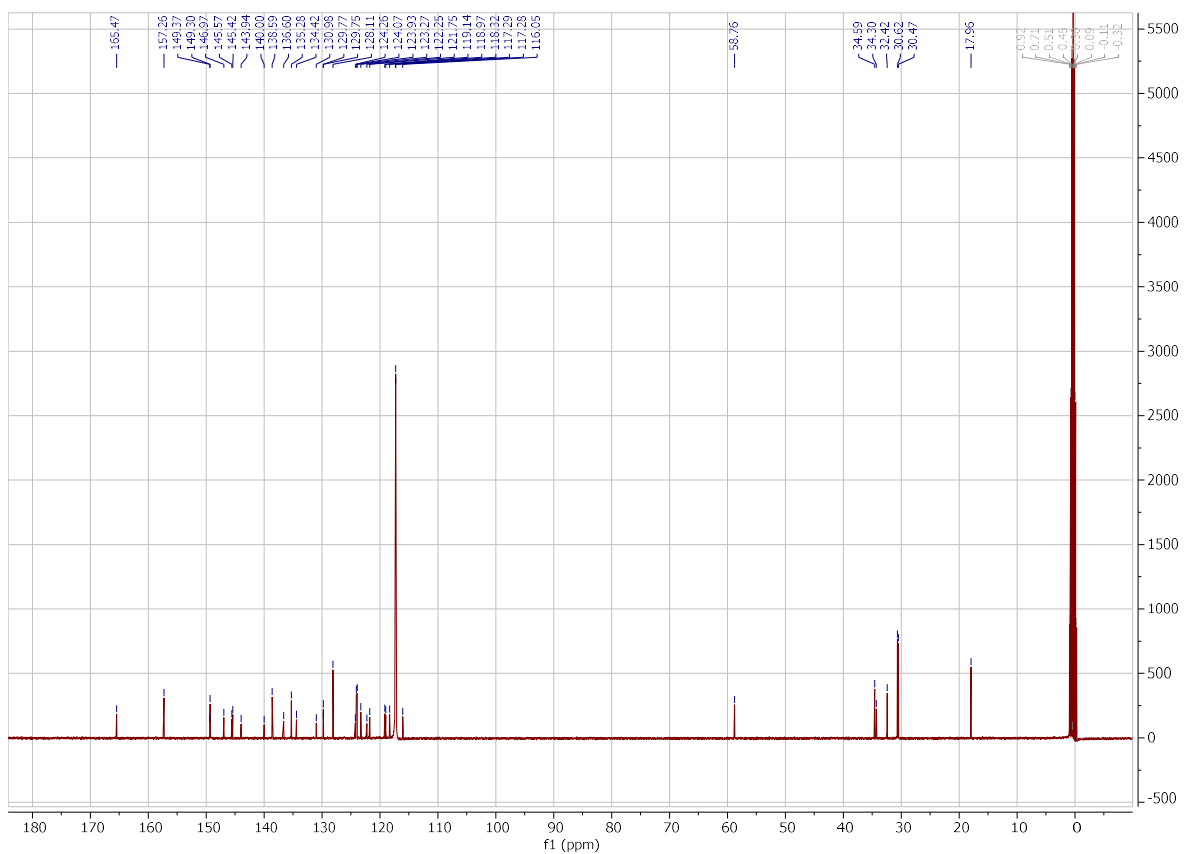

**Figure S3.**  $^{13}\text{C}$  NMR spectrum of  $[\text{Cu}(\text{CN}(2,6\text{-Me}_2\text{C}_6\text{H}_3))(\text{LigH}_2)](\text{PF}_6)$  (**2(PF<sub>6</sub>)**) ( $\text{CD}_3\text{CN}$ , 150 MHz).

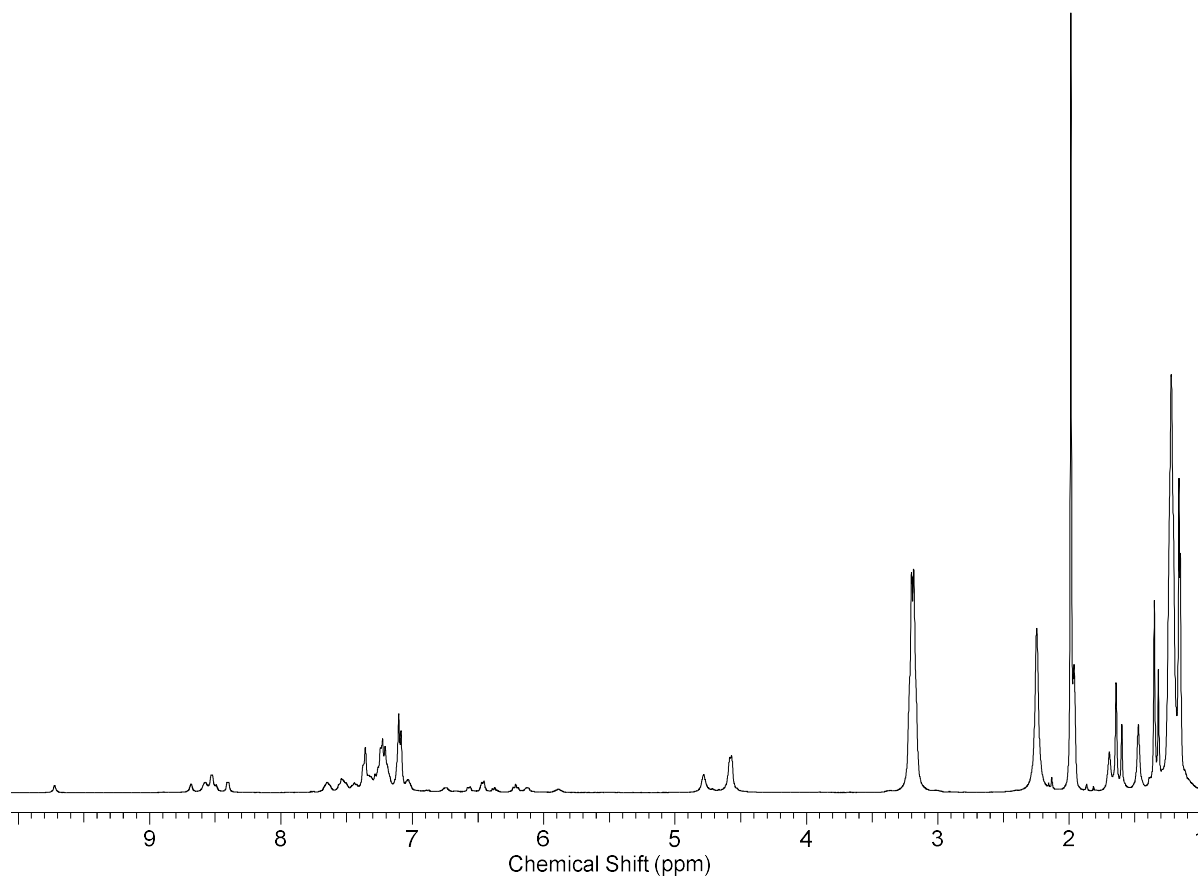

**Figure S4.**  $^1\text{H}$  NMR spectrum of the reaction between  $[\text{Cu}(\text{CN}(2,6\text{-Me}_2\text{C}_6\text{H}_3))(\text{LigH}_2)](\text{PF}_6)$  (**2**( $\text{PF}_6$ )) and  $(\text{NEt}_4)_2[\text{MoO}_4]$  ( $\text{CD}_3\text{CN}$ , 400 MHz).

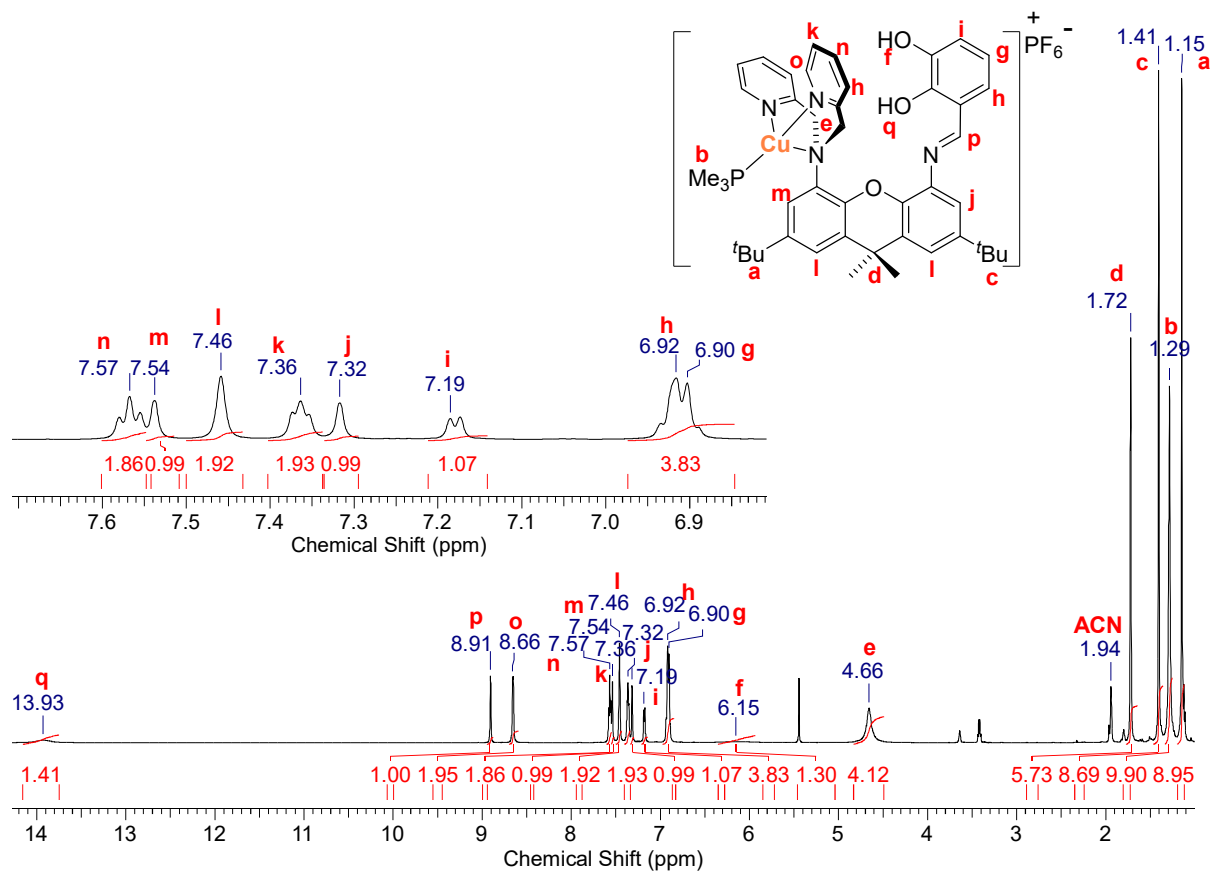

**Figure S5.** <sup>1</sup>H NMR spectrum of  $[Cu(PMe_3)(LigH_2)](PF_6)$  (**4**(PF<sub>6</sub>)) (CD<sub>3</sub>CN, 400 MHz).

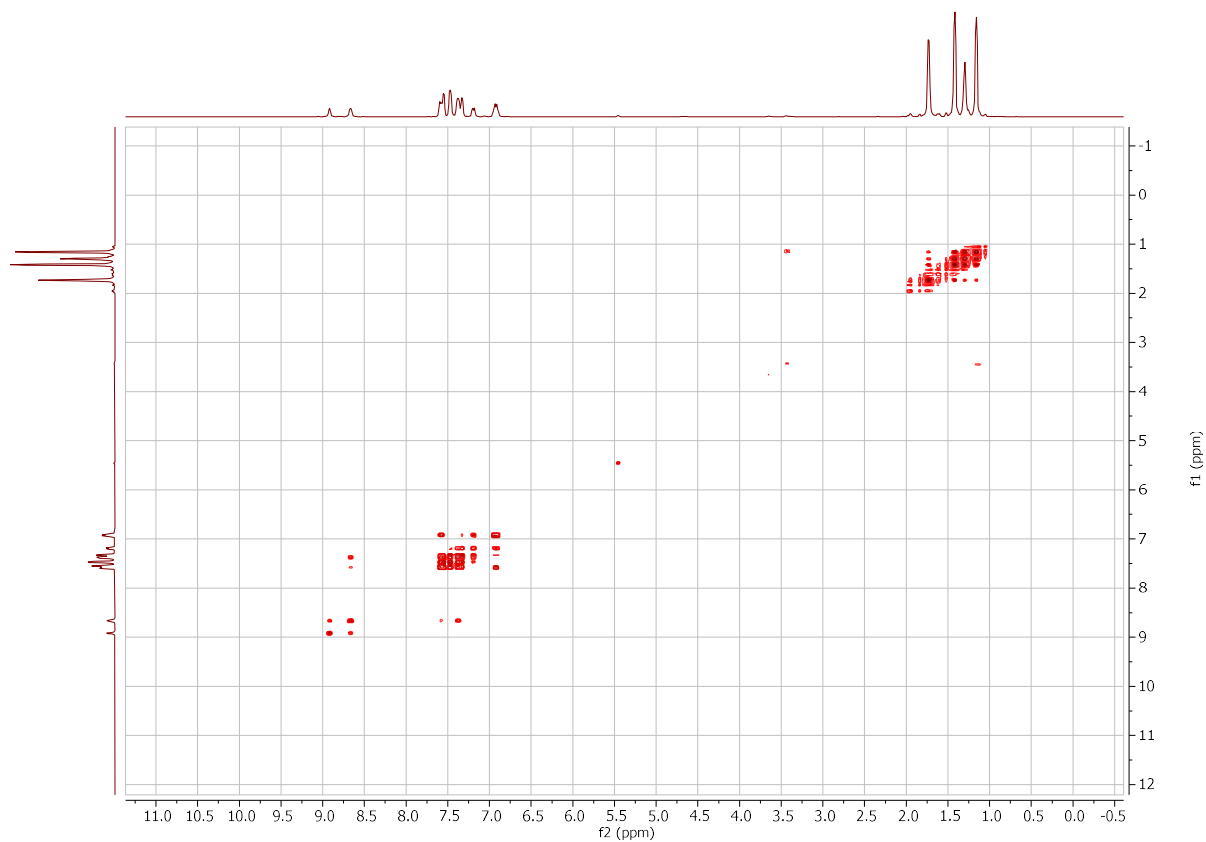

**Figure S6.**  $^1\text{H}$ - $^1\text{H}$  COSY NMR spectrum of  $[\text{Cu}(\text{PMe}_3)(\text{LigH}_2)](\text{PF}_6)$  (**4**( $\text{PF}_6$ )) ( $\text{CD}_3\text{CN}$ , 400 MHz)



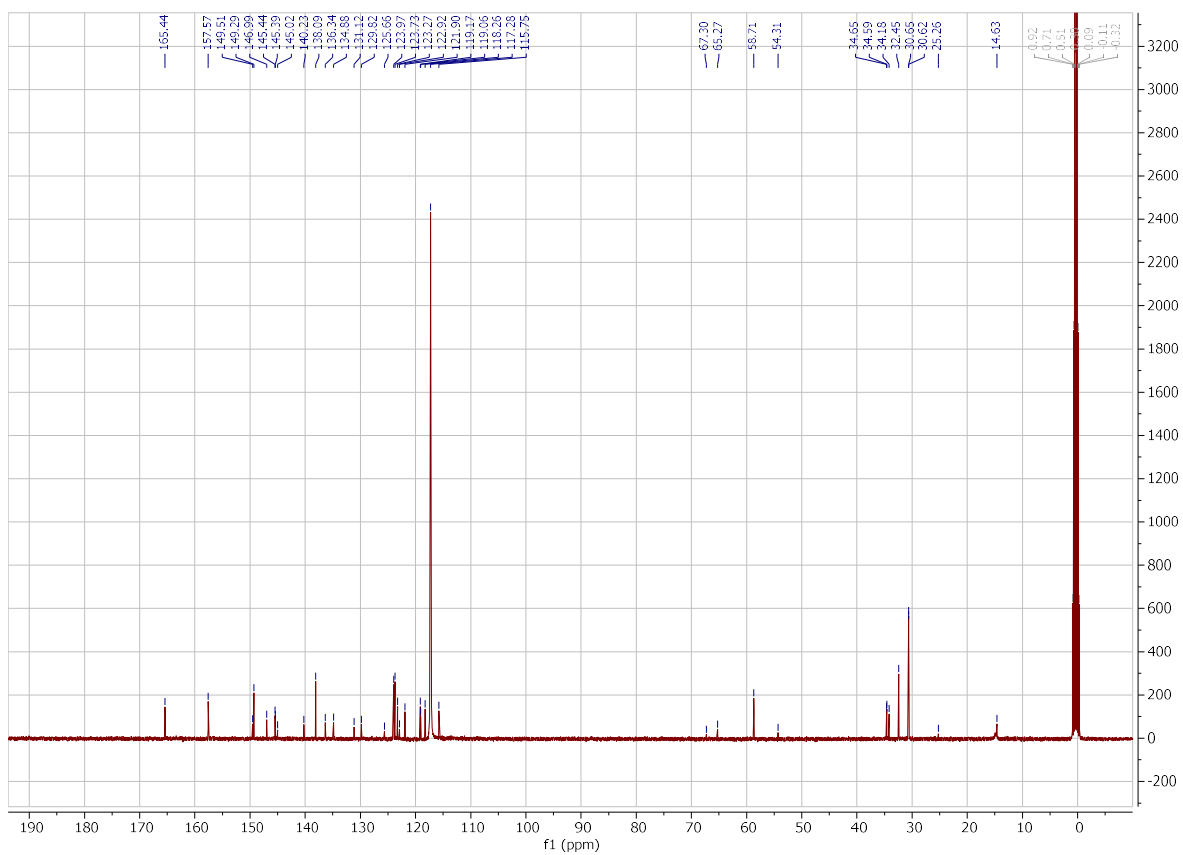

**Figure S7.**  $^{13}\text{C}$  NMR spectrum of  $[\text{Cu}(\text{PMe}_3)(\text{LigH}_2)](\text{PF}_6)$  (**4**( $\text{PF}_6$ )) ( $\text{CD}_3\text{CN}$ , 150 MHz)

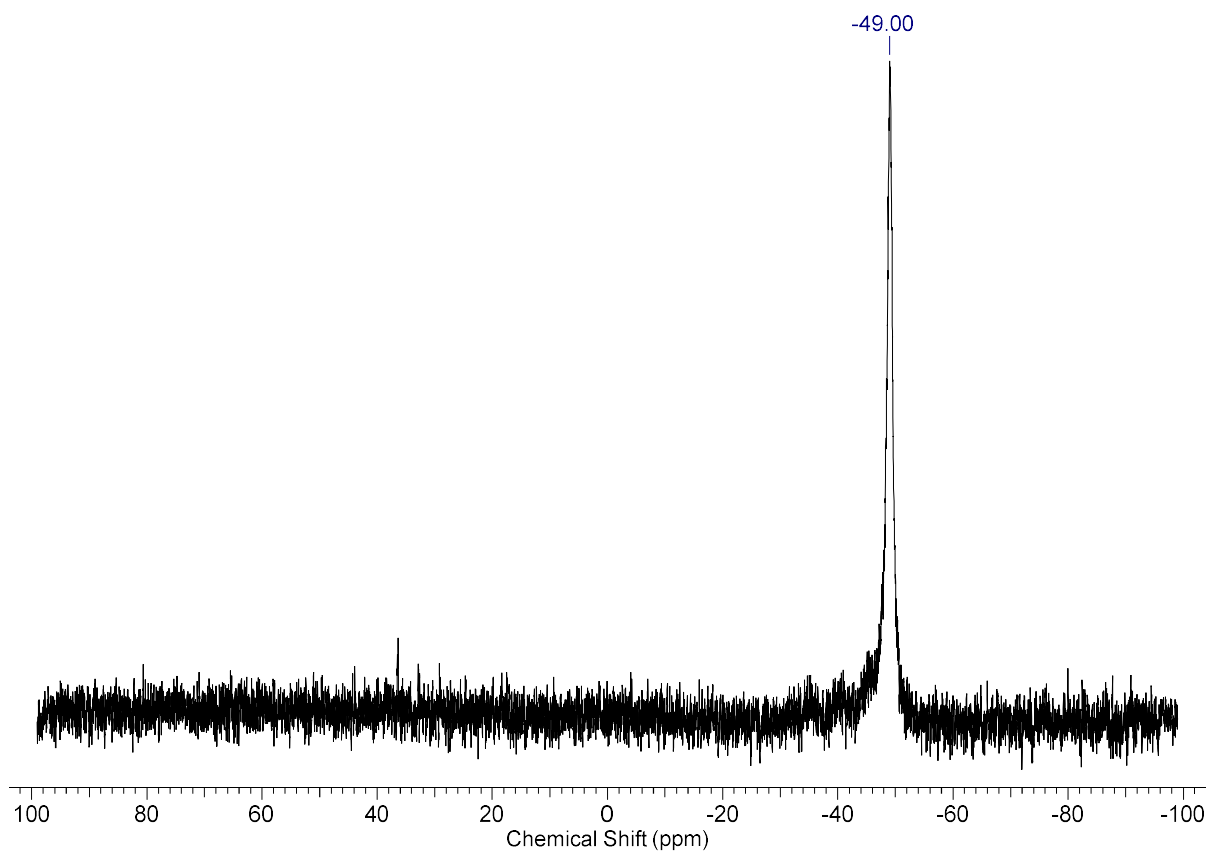

**Figure S8.**  $^{31}\text{P}$  NMR spectrum of  $[\text{Cu}(\text{PMe}_3)(\text{LigH}_2)](\text{PF}_6)$  (**4**( $\text{PF}_6$ )) ( $\text{CD}_3\text{CN}$ , 400 MHz).

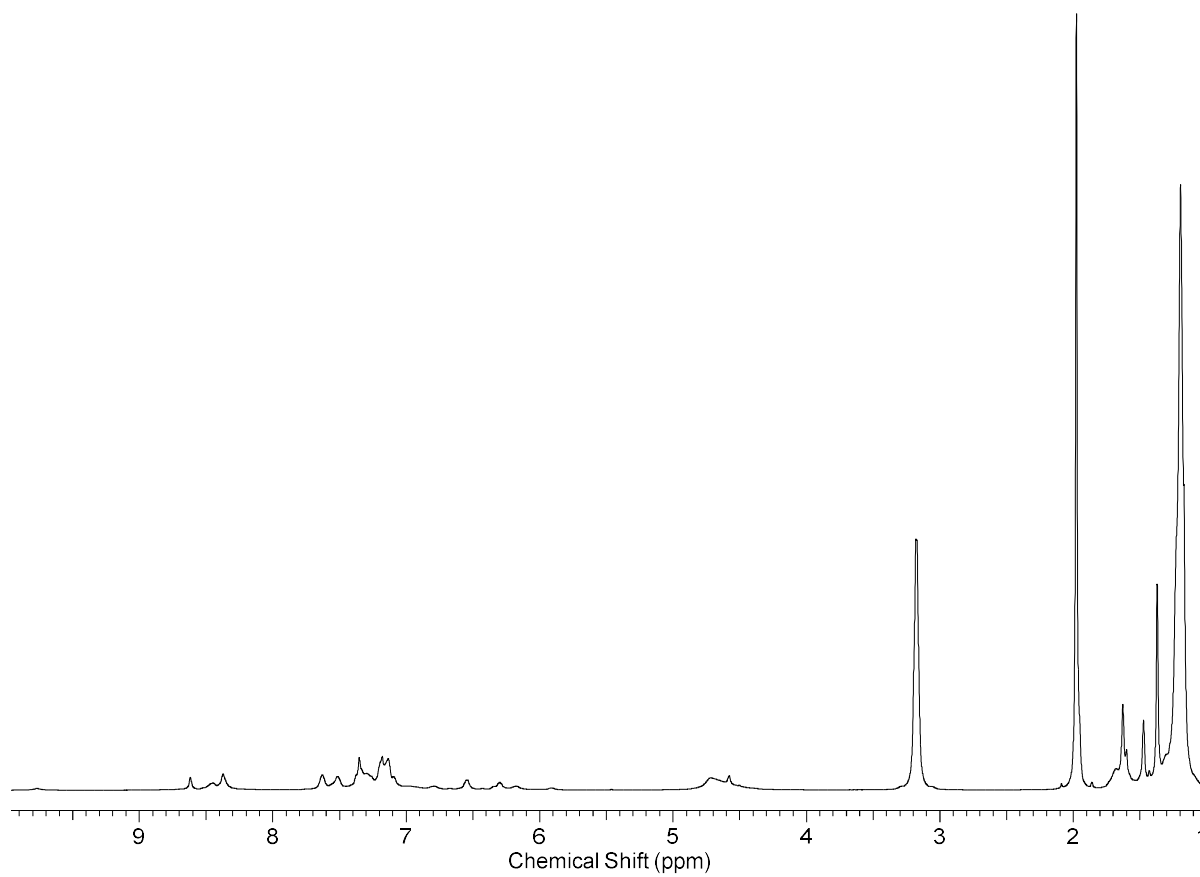

**Figure S9.**  $^1\text{H}$  NMR spectrum of the reaction between  $[\text{Cu}(\text{PMe}_3)(\text{LigH}_2)](\text{PF}_6)$  (**4(PF<sub>6</sub>)**) with  $(\text{NEt}_4)_2[\text{MoO}_4]$  ( $\text{CD}_3\text{CN}$ , 400 MHz).

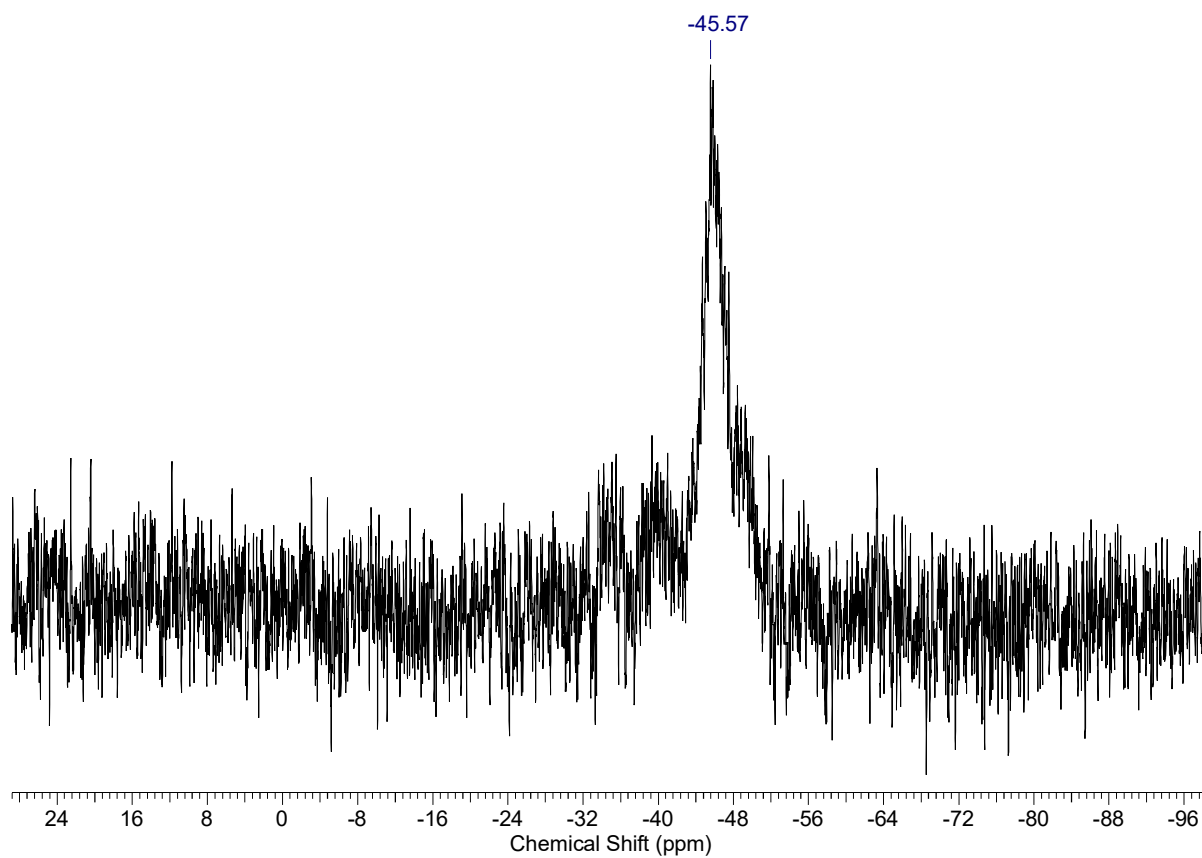

**Figure S10.**  $^{31}\text{P}$  NMR spectrum of the reaction between  $[\text{Cu}(\text{PMe}_3)(\text{LigH}_2)](\text{PF}_6)$  (**4**( $\text{PF}_6$ )) with  $(\text{NEt}_4)_2[\text{MoO}_4]$  ( $\text{CD}_3\text{CN}$ , 400 MHz).

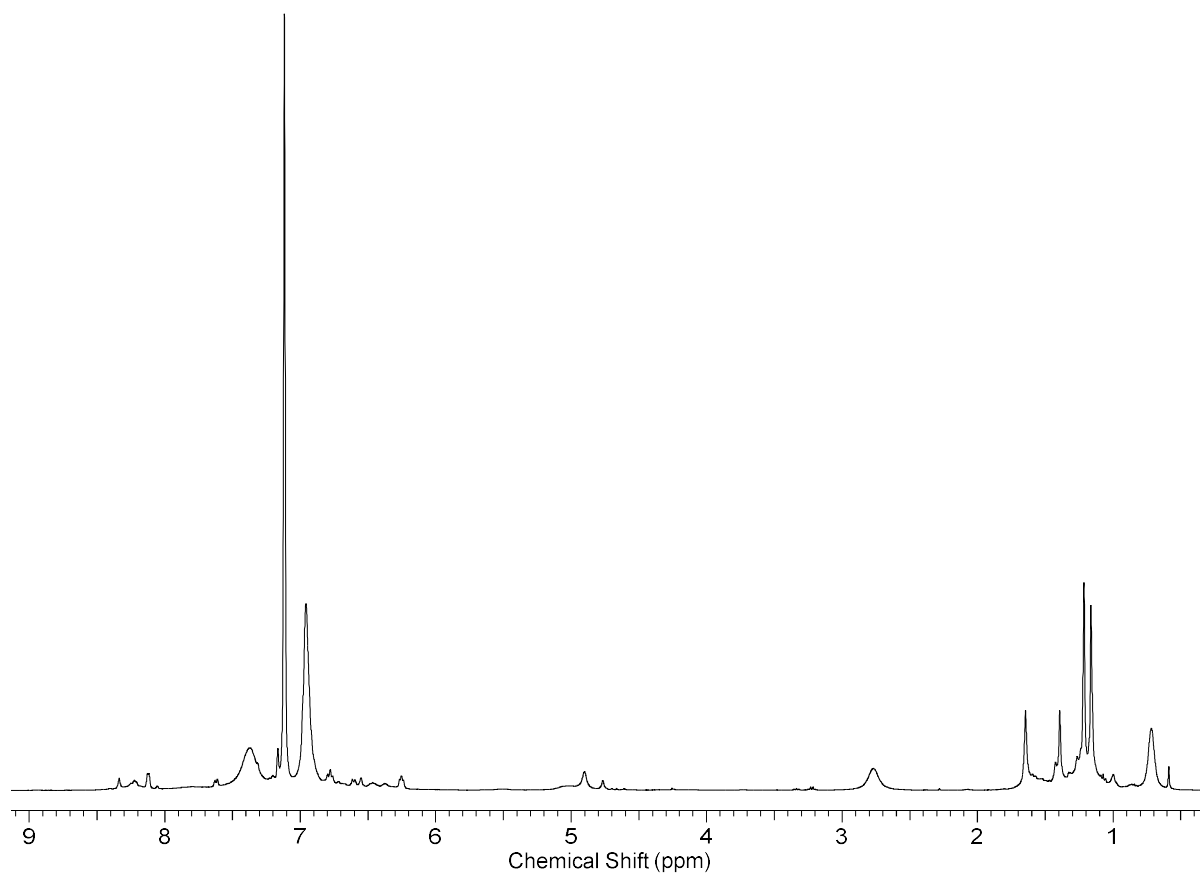

**Figure S11.**  $^1\text{H}$  NMR spectrum of the reaction between  $[\text{Cu}(\text{PPh}_3)(\text{LigH}_2)](\text{PF}_6)$  (**3**( $\text{PF}_6$ ) and  $(\text{NEt}_4)_2[\text{MoO}_4]$  ( $\text{CD}_3\text{CN}$ , 400 MHz).

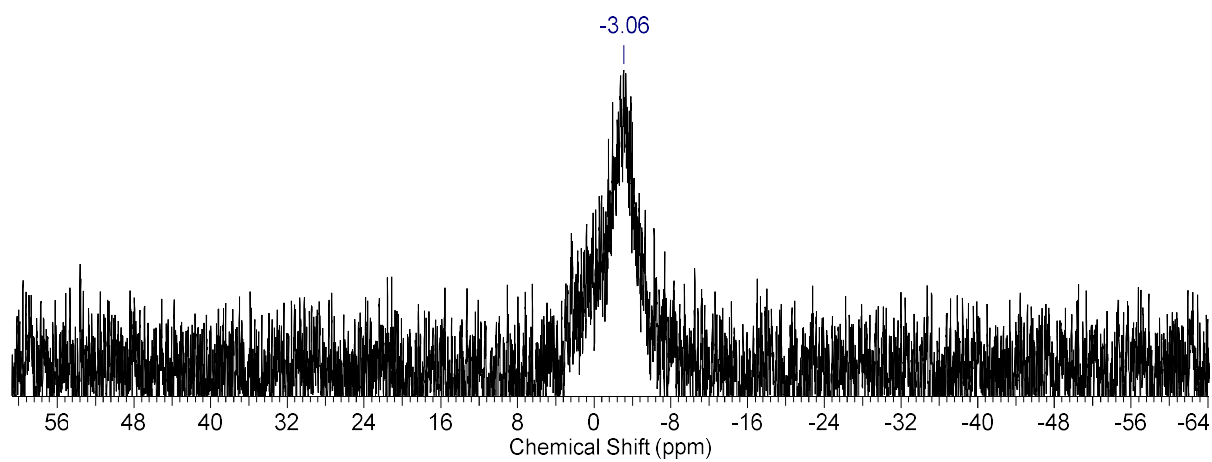

**Figure S12.**  $^{31}\text{P}$  NMR spectrum of the between  $[\text{Cu}(\text{PPh}_3)(\text{LigH}_2)](\text{PF}_6)$  (**3**( $\text{PF}_6$ ) and  $(\text{NEt}_4)_2[\text{MoO}_4]$  ( $\text{CD}_3\text{CN}$ , 400 MHz).

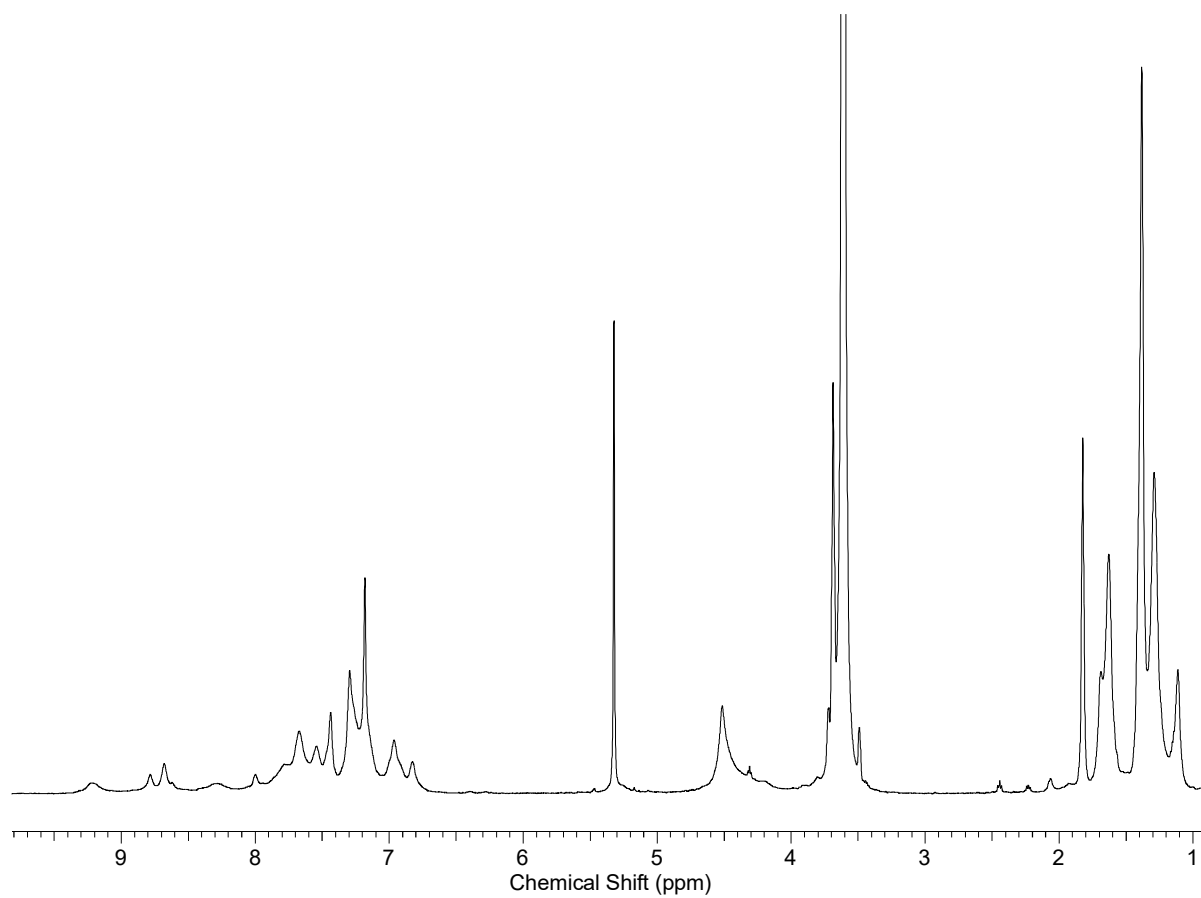

**Figure S13.**  $^1\text{H}$  NMR spectrum of the reaction between **1**(PF<sub>6</sub>) and NaCN (CD<sub>3</sub>CN, 400 MHz).

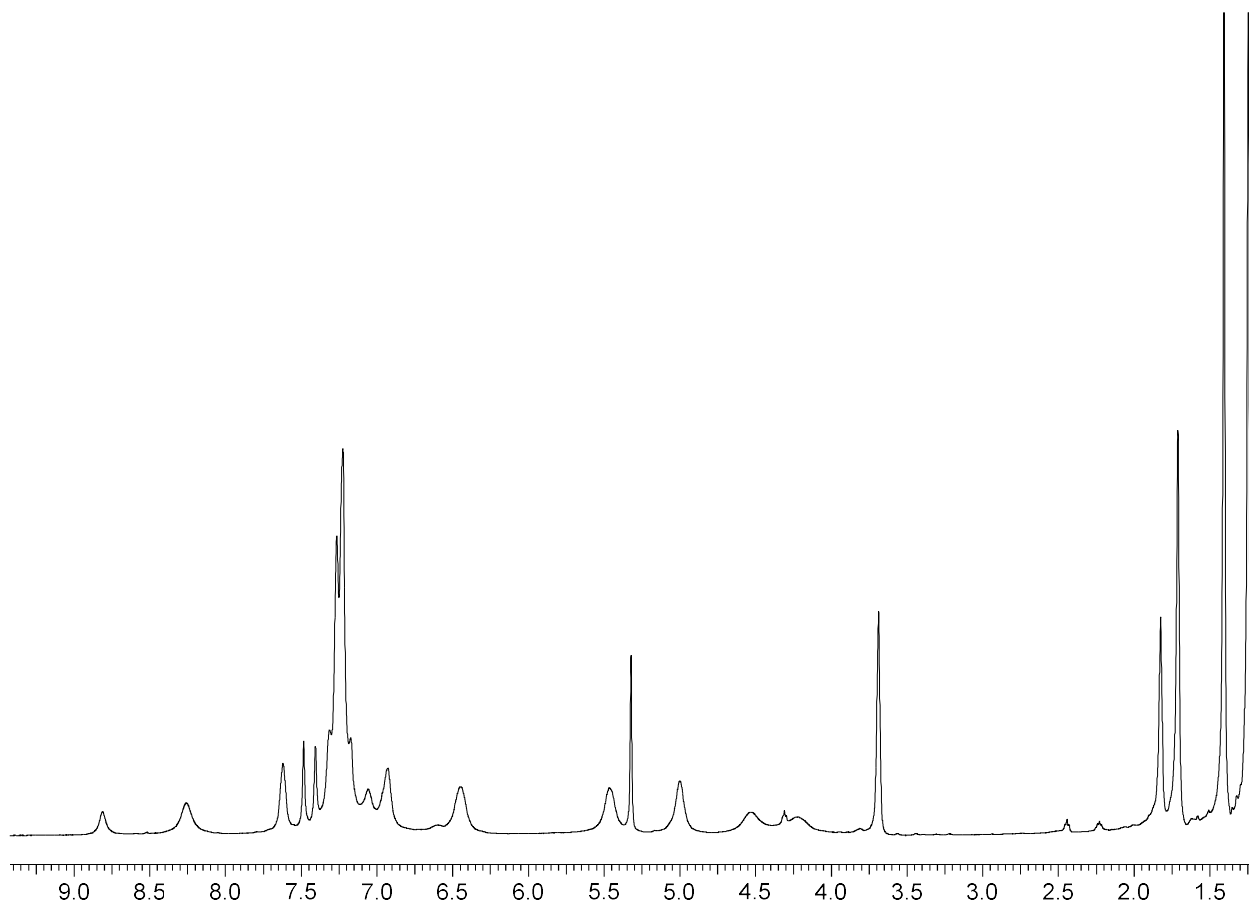

**Figure S14.**  $^1\text{H}$  NMR spectrum of the reaction between **1**(PF<sub>6</sub>) and styrene (CD<sub>2</sub>Cl<sub>2</sub>, 400 MHz).



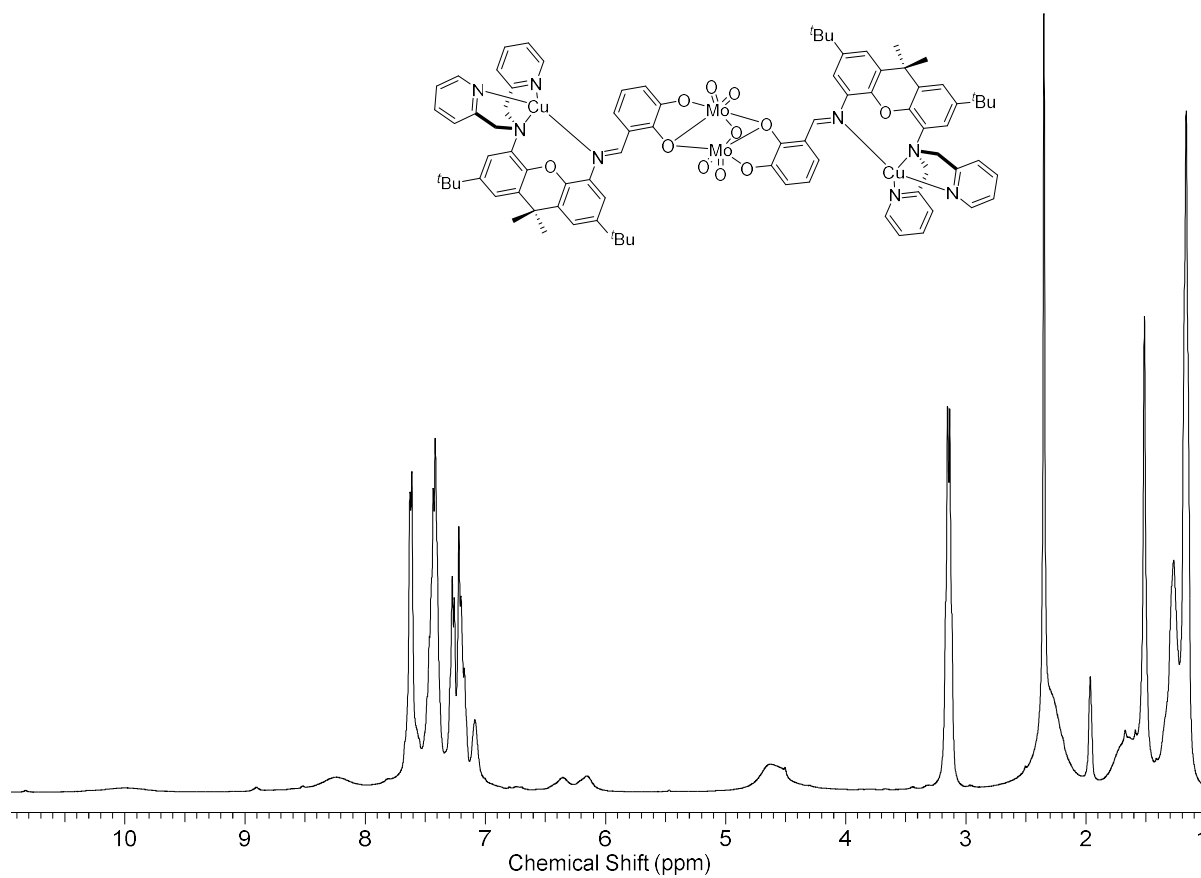

**Figure S15.**  $^1\text{H}$  NMR spectrum of  $[\text{Cu}_2\text{Mo}_2\text{O}_4(\mu_2\text{-O})(\text{Lig})_2]$  (6) ( $\text{CD}_3\text{CN}$ , 400 MHz).

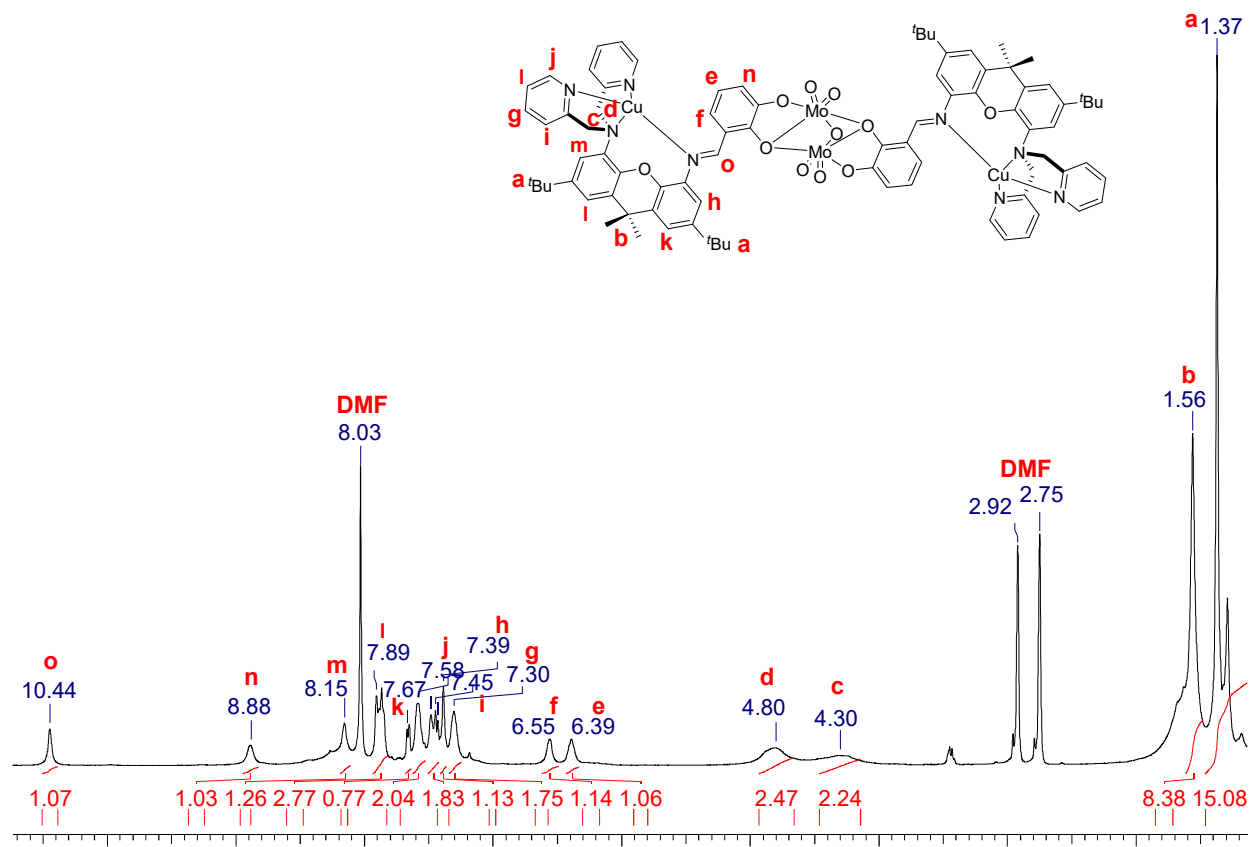

**Figure S16.**  $^1\text{H}$  NMR spectrum of  $[\text{Cu}_2\text{Mo}_2\text{O}_4(\mu_2\text{-O})(\text{Lig})_2]$  (6) (DMF- $d_7$ , 400 MHz).

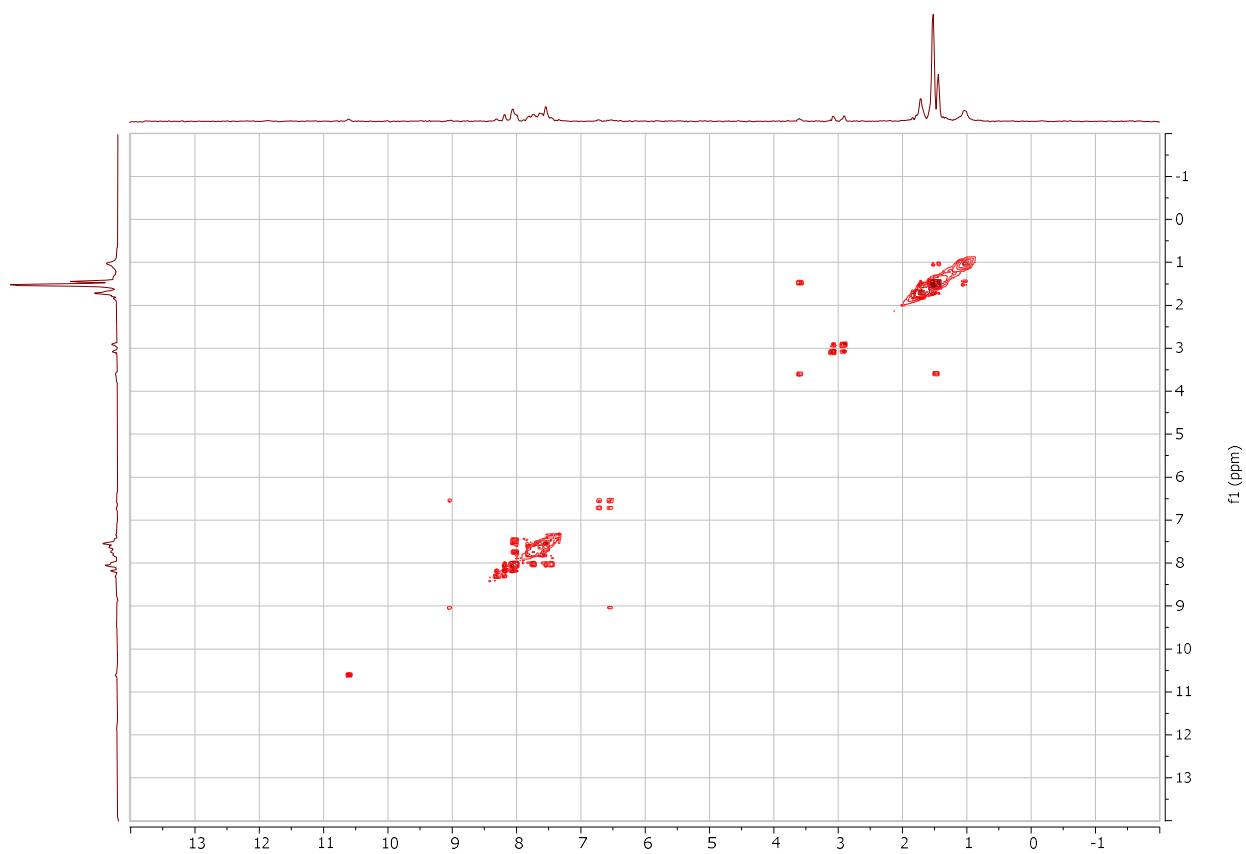

**Figure S17.**  $^1\text{H}$ - $^1\text{H}$  COSY NMR spectrum of  $[\text{Cu}_2\text{Mo}_2\text{O}_4(\mu_2\text{-O})(\text{Lig})_2]$  (**6**) ( $\text{DMF-d}_7$ , 400 MHz).

## 2. Mass spectra

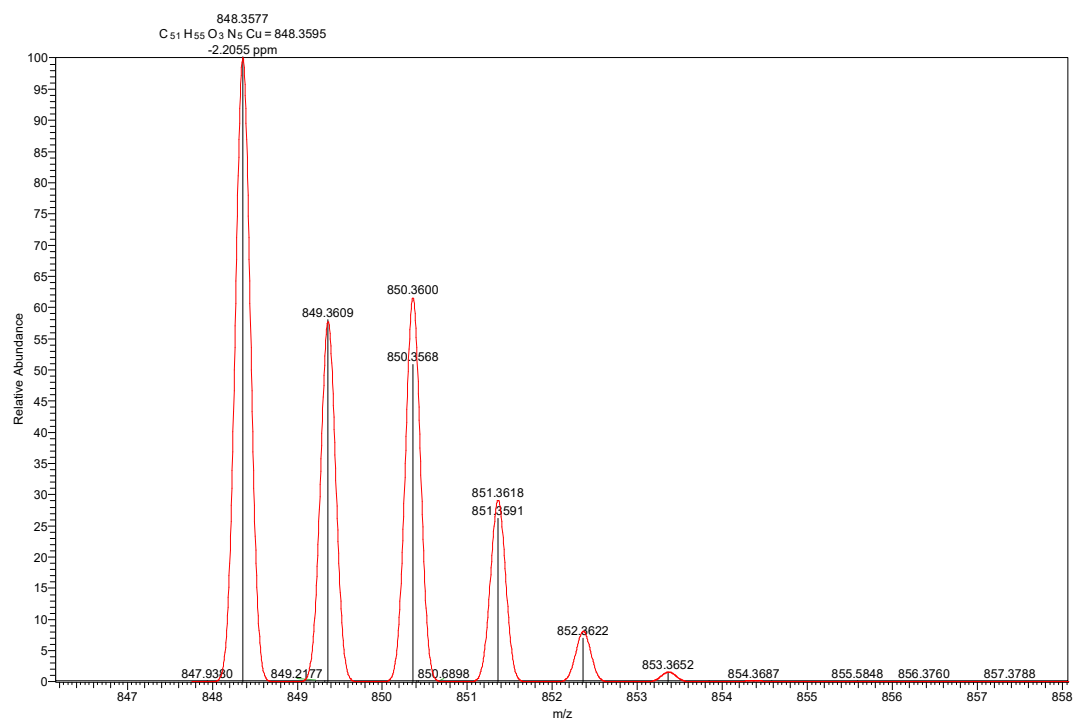

**Figure S18.** High-resolution mass spectrum of  $[\text{Cu}(\text{CN}(2,6\text{-Me}_2\text{C}_6\text{H}_3))(\text{LigH}_2)]^+$  ( $2^+$ ).

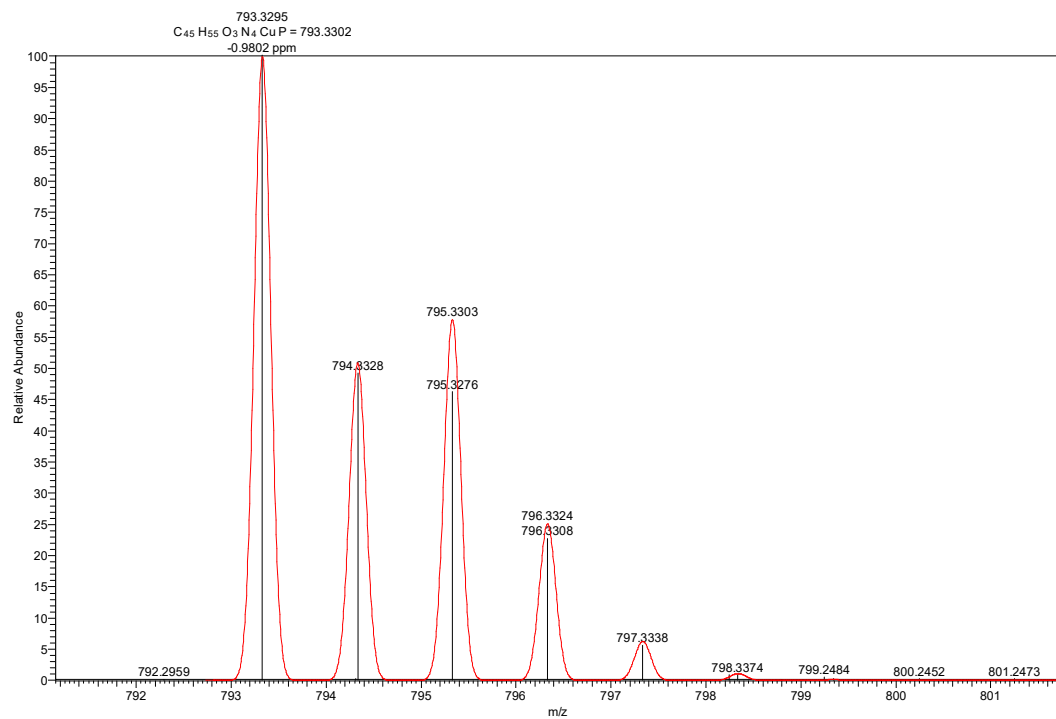

**Figure S19.** High-resolution mass spectrum of  $[\text{Cu}(\text{PMe}_3)(\text{LigH}_2)]^+ (3^+)$ .

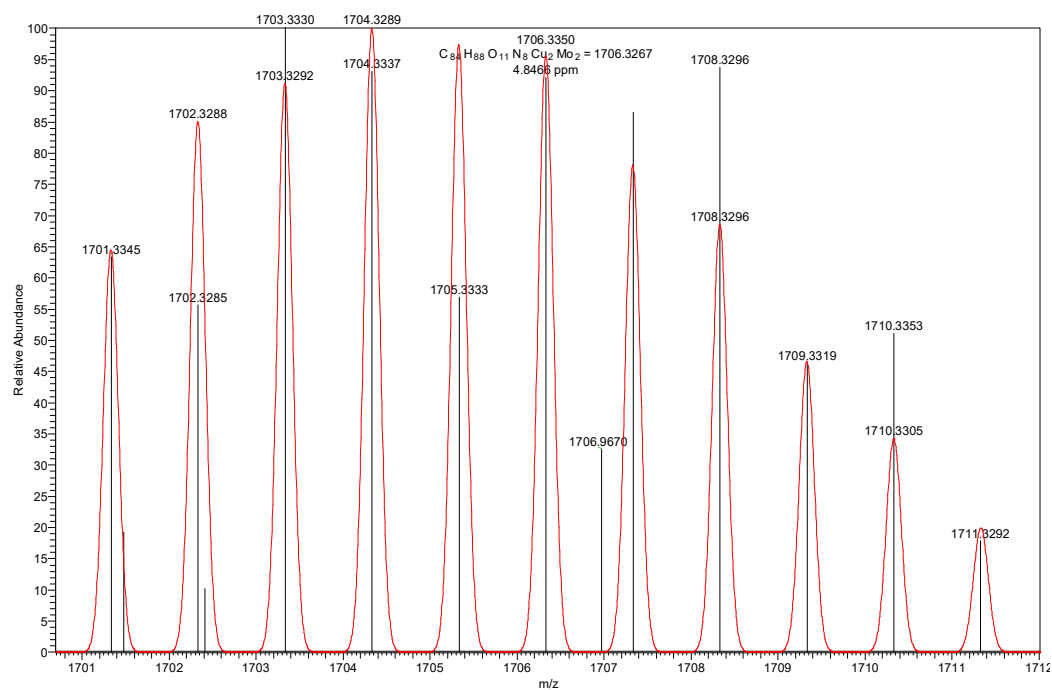

**Figure S20.** High-resolution mass spectrum of  $[\text{Cu}_2\text{Mo}_2\text{O}_4(\mu_2\text{-O})(\text{Lig})_2]^+$  ( $6^+$ ).

### 3. IR spectra

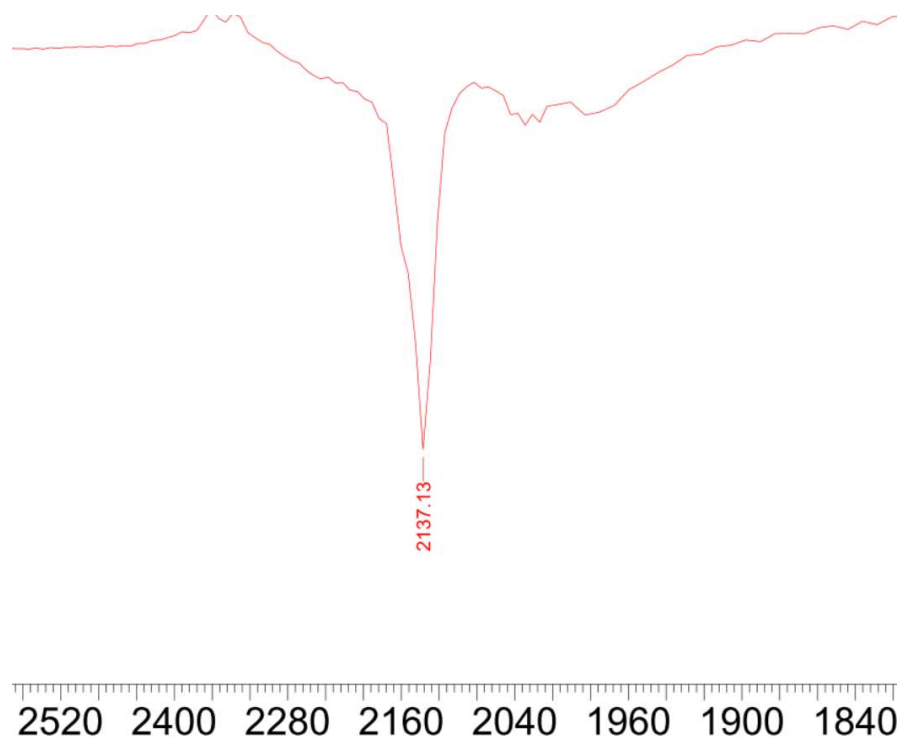

**Figure S21.** IR spectrum of  $[\text{Cu}(\text{CN}(2,6\text{-Me}_2\text{C}_6\text{H}_3))(\text{LigH}_2)](\text{PF}_6)$  (**2**( $\text{PF}_6$ )) (isocyanide CN stretch region).

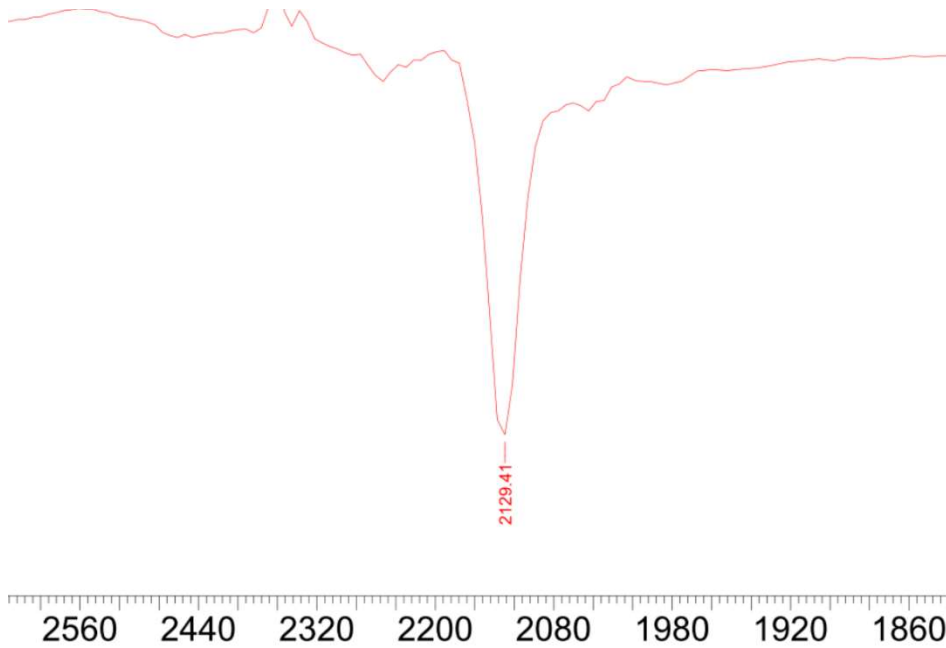

**Figure S22.** IR spectrum of the reaction product between  $[\text{Cu}(\text{CN}(2,6\text{-Me}_2\text{C}_6\text{H}_3))(\text{LigH}_2)](\text{PF}_6)$  (**2**( $\text{PF}_6$ ) and  $(\text{NEt}_4)_2[\text{MoO}_4]$  (isocyanide CN stretch region).
